# Supplementary material for: Pathways for macrophage uptake of cell-free circular RNAs
Source: PubMed Central journal article supplement (PMC11218042; doi:10.1016/j.molcel.2024.04.022), 2024-05-17
Supplement: NIHMS1992517-supplement-1.pdf [file NIHMS1992517-supplement-1.pdf]

# Supplemental Information

## Supplementary Figures

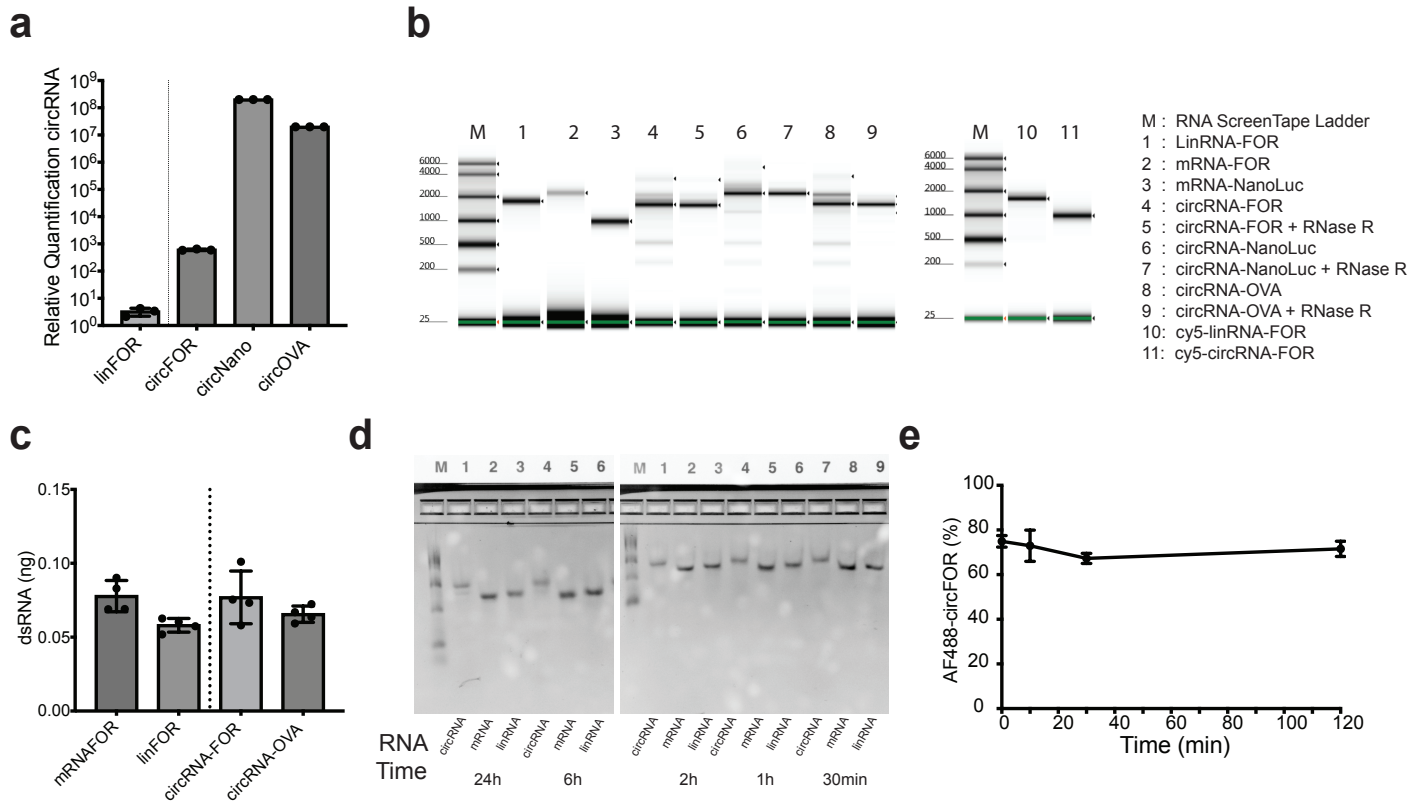

**Supplementary Figure 1. Quality assessment of in vitro transcribed circRNA.** Related to STAR Methods. **a**, Relative quantification of circular RNA (circRNA) by qPCR using divergent primers that span the splice junction and only amplify products when circRNA is present. **b**, Quality control of RNA in vitro transcription and assessment of circRNA purity after RNase R digestion with Tape Station. **c**, Quantitative ELISA for sensitive and selective detection of double-stranded RNA (dsRNA) molecules larger than 30-40 base pairs. **d**, Gel electrophoresis analysis of RNA samples after incubation in serum-free media for durations ranging from 30 minutes to 24 hours. **e**, Percentage of circRNA uptake after incubation in serum-free medium for durations ranging from 10 minutes to 2 hours.

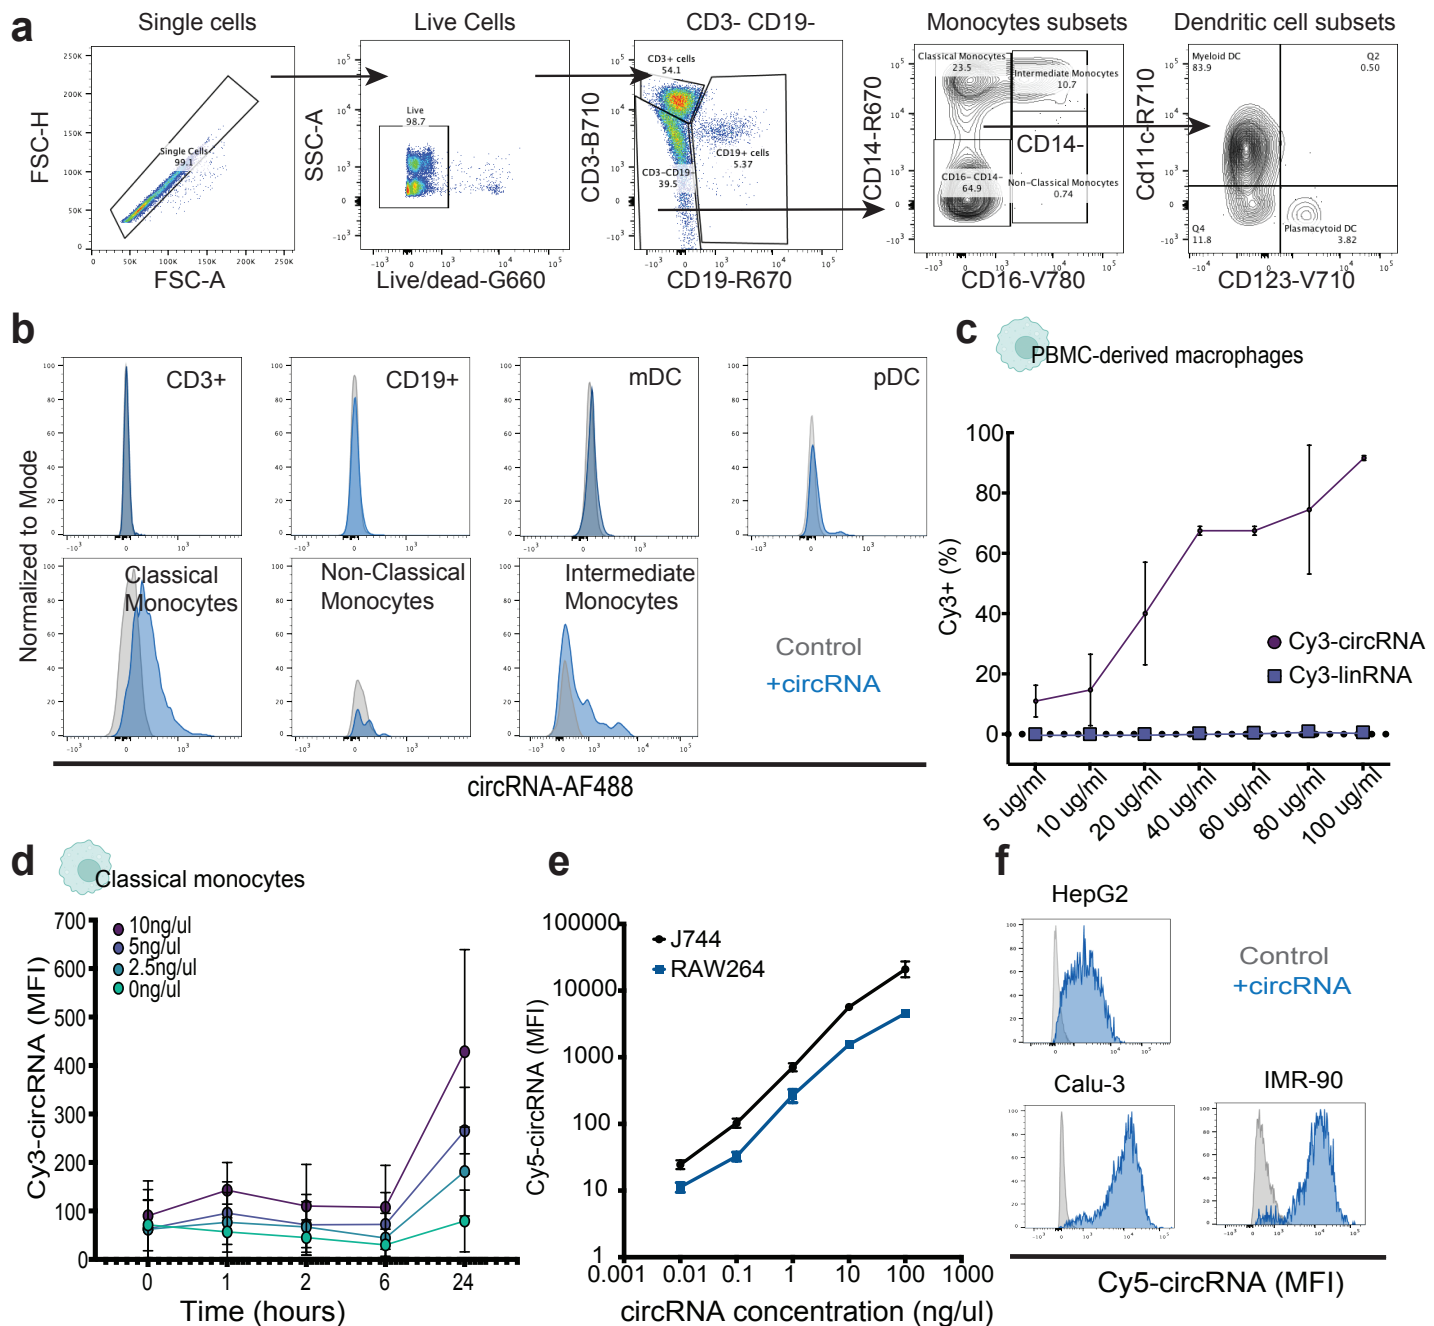

**Supplementary Figure. 2. Extracellular circular RNA uptake is cell specific.** Related to Figure 1. **a**, Gating strategy used to define myeloid human cell population after uptake of circRNA. **b**, Histogram representation of fluorescent intensity shift after circRNA uptake in human immune cell subsets corresponding to **Fig. 1c** (representative sample). **c**, Flow cytometry quantification of increasing concentration of circRNA and linRNA in human PBMC-derived macrophages. **d**, CircRNA is taken up by human classical monocytes in a dose and time dependent manner ( $n = 4$ , bars represent SEM). **e**, circRNA is taken up by J774 and RAW cells in a dose dependent manner ( $n = 4$ , bars represent SEM). **f**, Histogram representation of fluorescence intensity shift after circRNA uptake in human liver and lung cell lines (representative sample).

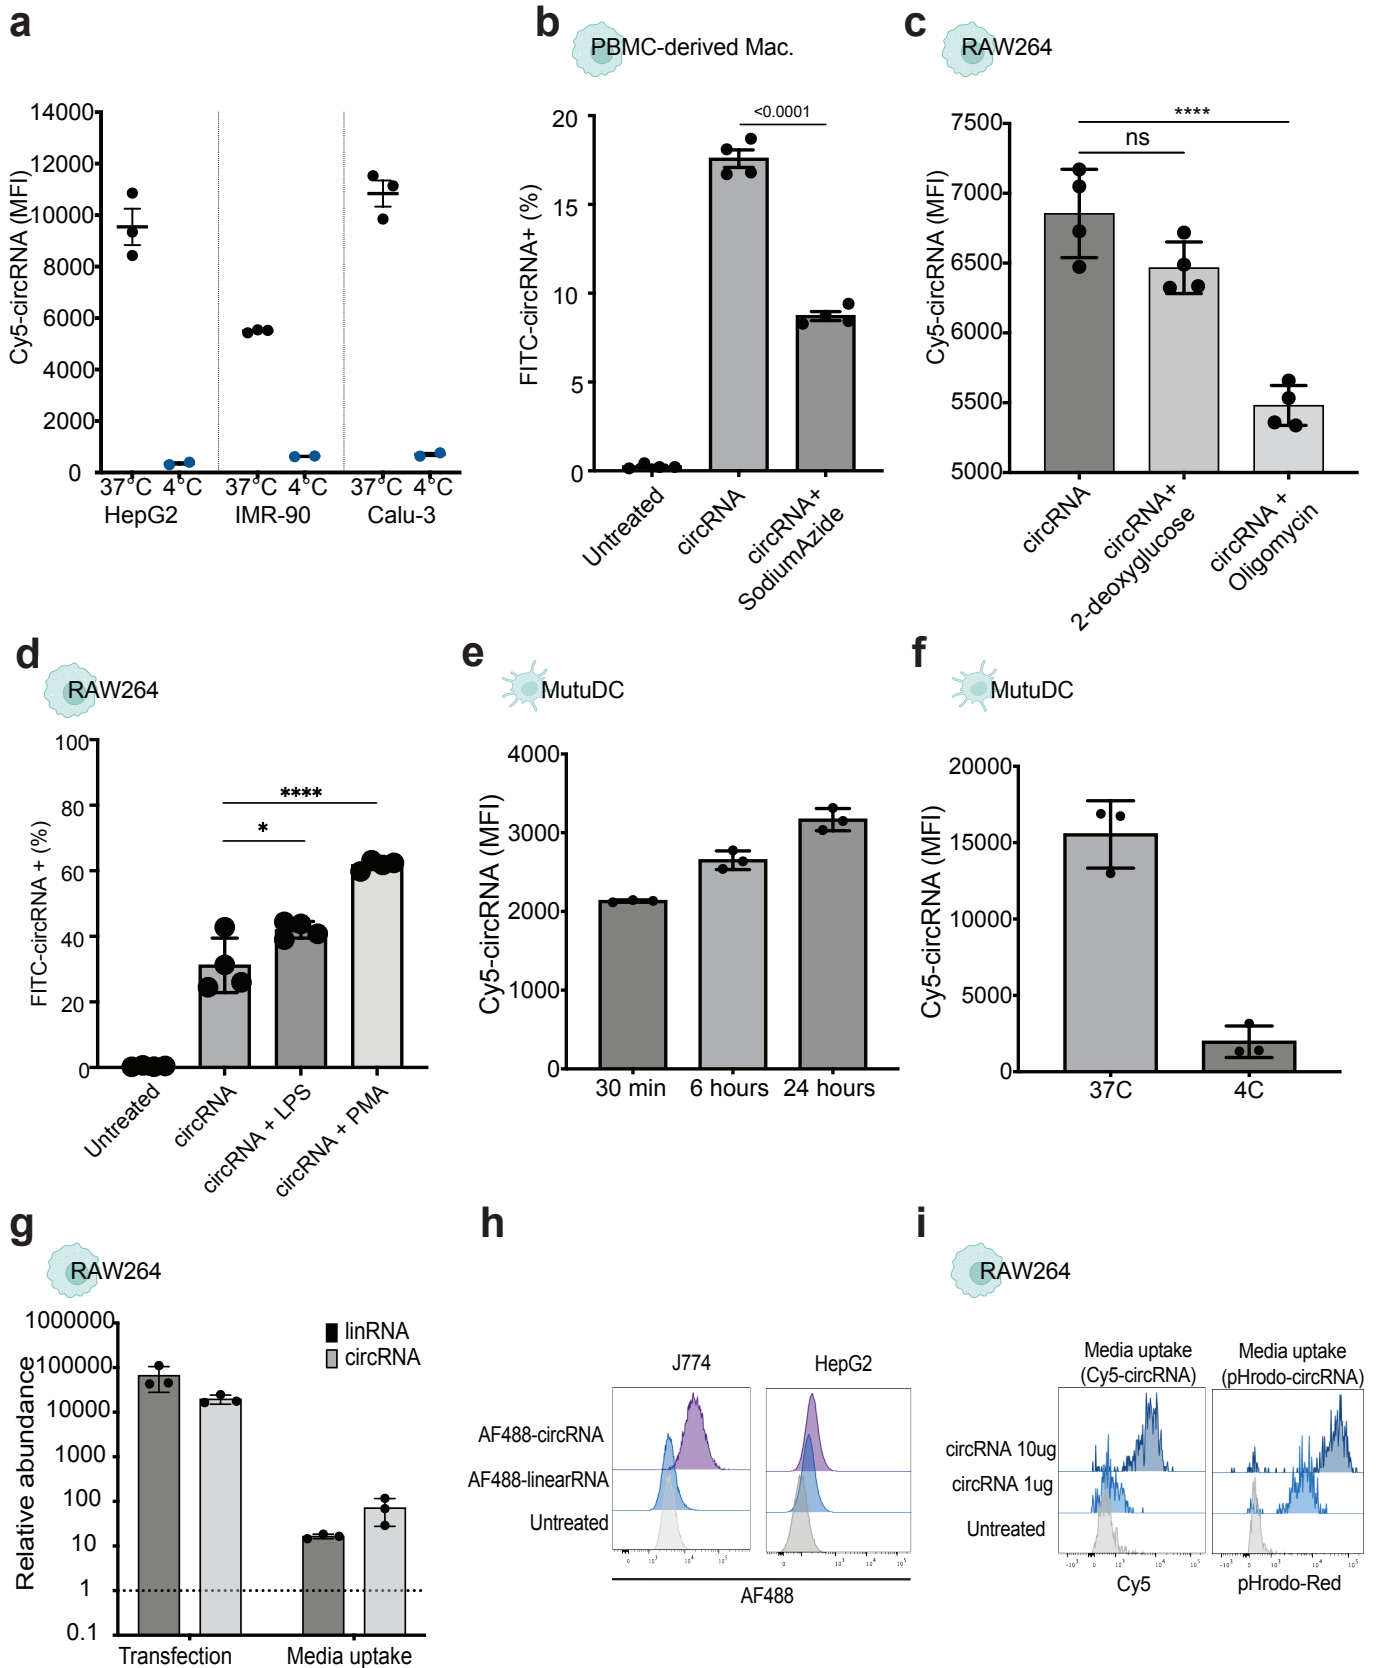

**Supplementary Figure 3. CircRNA uptake is a fast and active process in distinct cell lines.** Related to Figure 2. **a**, circRNA uptake is inhibited at cold temperatures in human liver and lung cell lines ( $n = 3$ , bars represent SEM). **b**, Sodium azide effect on circRNA uptake in RAW264 cells ( $n = 3$ , bars represent SEM). **c**, Distinct metabolic inhibitors negatively inhibit circRNA uptake in RAW264 cells ( $n = 4$ , bars represent SEM). **d**, Maturation signals promote circRNA uptake in RAW264 cells ( $n = 3$ , bars represent SEM). **e**, Time course analysis of circRNA uptake measured by flow cytometry in MutuDC cells ( $n = 3$ , bars represent SEM). **f**,

Temperature effect on circRNA uptake in MutuDC cells (n = 3, bars represent SEM). **g**, qRT-PCR quantification of circRNA compared to mRNA after uptake or transfection in RAW264 cells (n = 3, bars represent SEM). **h**, Representative sample of circRNA uptake compared to mRNA in distinct cell types measured by flow cytometry. **i**, Representative sample of circRNA uptake measurement comparison between cy5-circRNA or pHrodo-circRNA at distinct concentrations in RAW264 cells. One-way ANOVA followed by Tukey's test was applied in b-d. \*P < 0.05, \*\*\*\*P < 0.0001. ns = not significant.

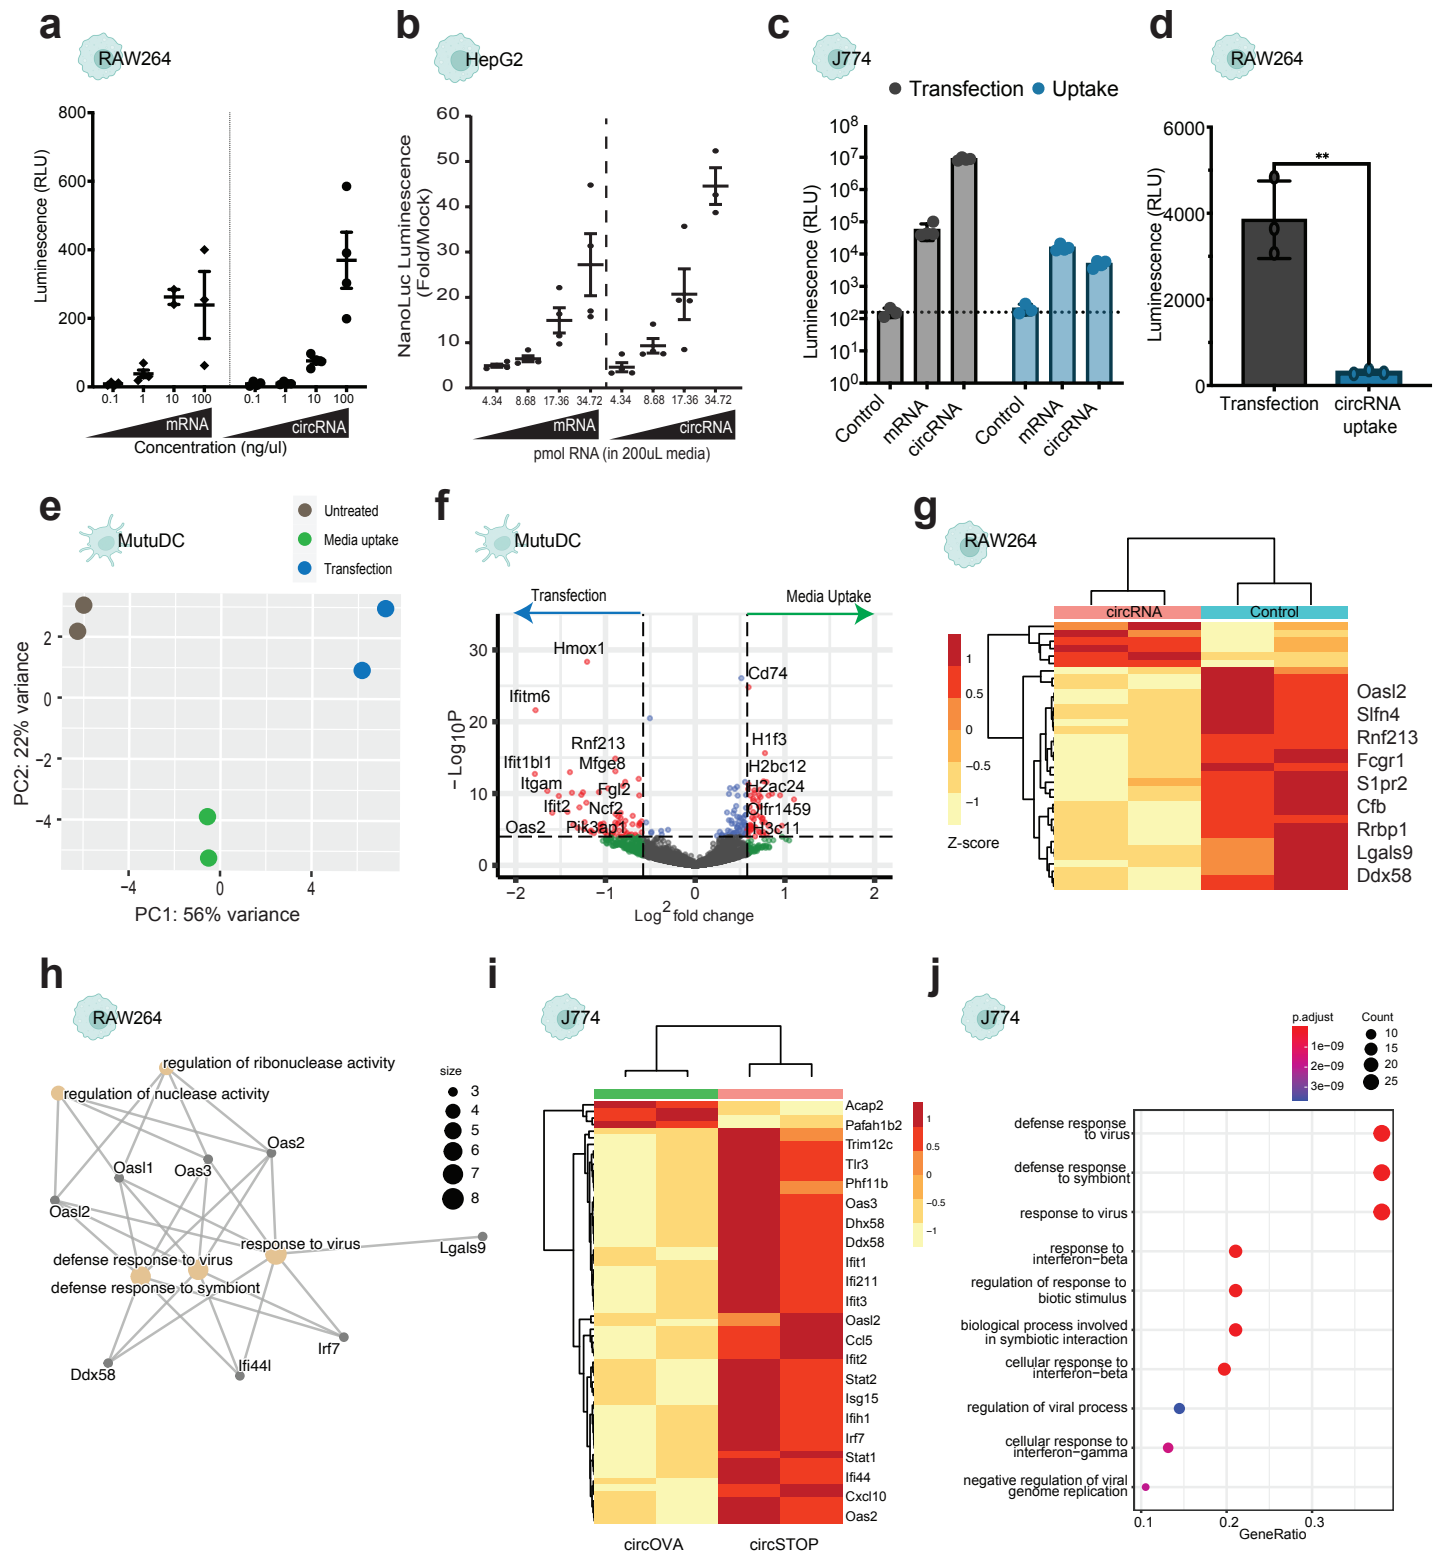

**Supplementary Figure 4. CircRNA uptake compared to cell transfection.** Related to Figure 3. Nanoluciferase intensity measured in **a**, RAW and **b**, HepG2 cells shows similar translation efficiency after uptake of mRNA (left) or circRNA (right) encoding Nanoluciferase protein. **c**, Nanoluciferase intensity measured in J774 cells after transfection and uptake of circRNA and mRNA compared to untranslatable control (n = 3, bars represent SEM). **d**, Nanoluciferase intensity measured in RAW264 cells after transfection and uptake (n = 3, bars represent SEM). Statistical significance was calculated using a two-tailed unpaired t-test, \*P < 0.05. **e**, PCA analysis of normalized and transformed transcriptome counts grouped by condition: Untreated, circRNA and CART-circRNA (n=2). **f**,

Volcano plot with the log<sub>2</sub> fold changes in gene expression between circRNA uptake and circRNA transfection. The gene symbols of the top differentiated genes ordered by padj value are displayed. **g**, Heatmap of normalized expression data showing differentially regulated genes following circRNA uptake in RAW264 cells **h**, Functional analysis of the top differentially expressed genes and their linkages with biological concepts (GO terms) after circRNA uptake in RAW264 cells. **i**, Heatmap of normalized expression data showing differentially regulated genes following circRNA uptake in J774 cells **j**, Functional analysis of the top differentially expressed genes and their linkages with biological concepts (GO terms) after circRNA uptake in J774 cells.

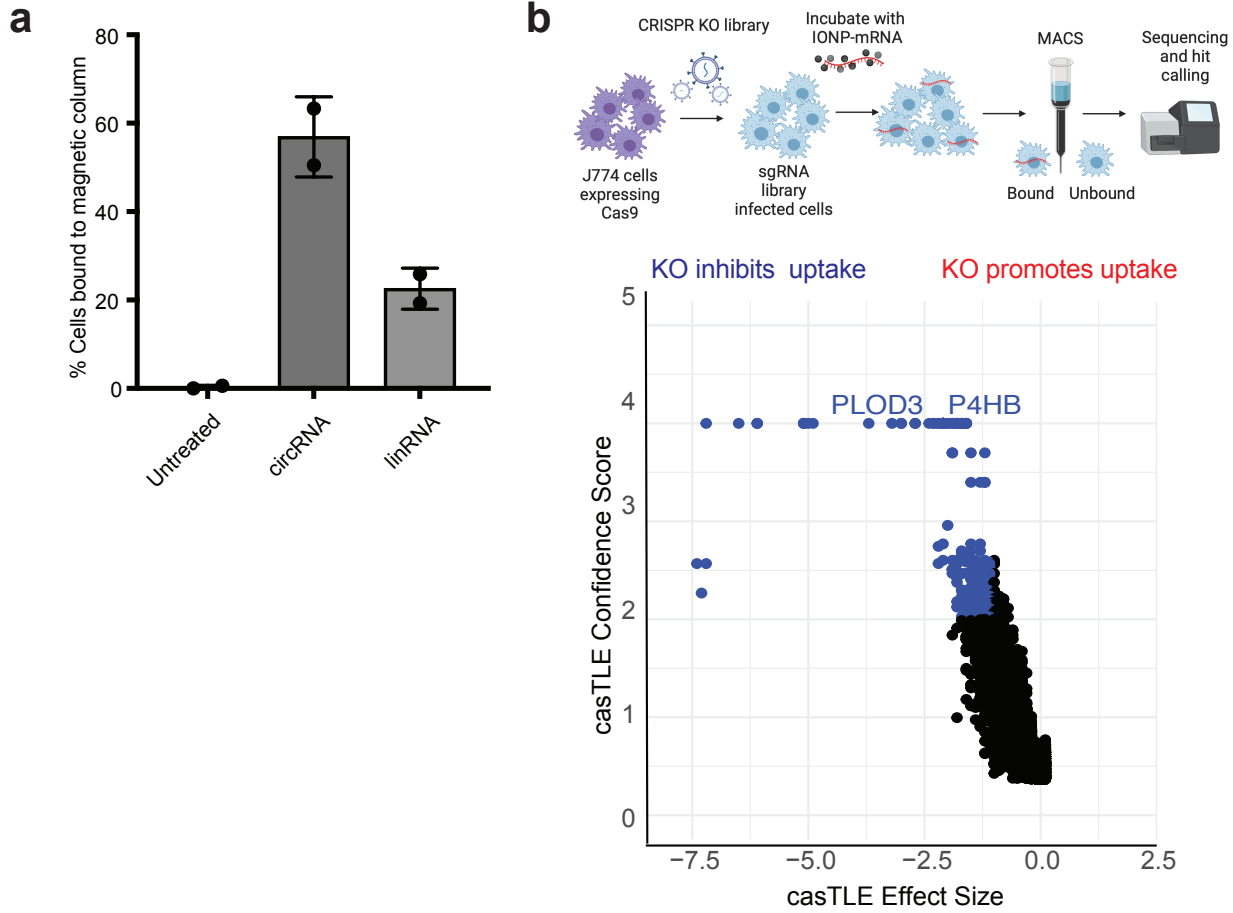

**Supplementary Figure 5. CRISPR KO screen for circRNA and linear RNA uptake.** Related to Figure 4. **a**, Percentage of J774 cells bound to magnet when IONP is covalently bound to circRNA or mRNA. **b**, Schematic representation of linear mRNA uptake screening using magnetic separation (top) and volcano plot of all genes indicating effect and confidence scores for genome-wide linRNA uptake screen. Effect and confidence scores determined by casTLE. (bottom).

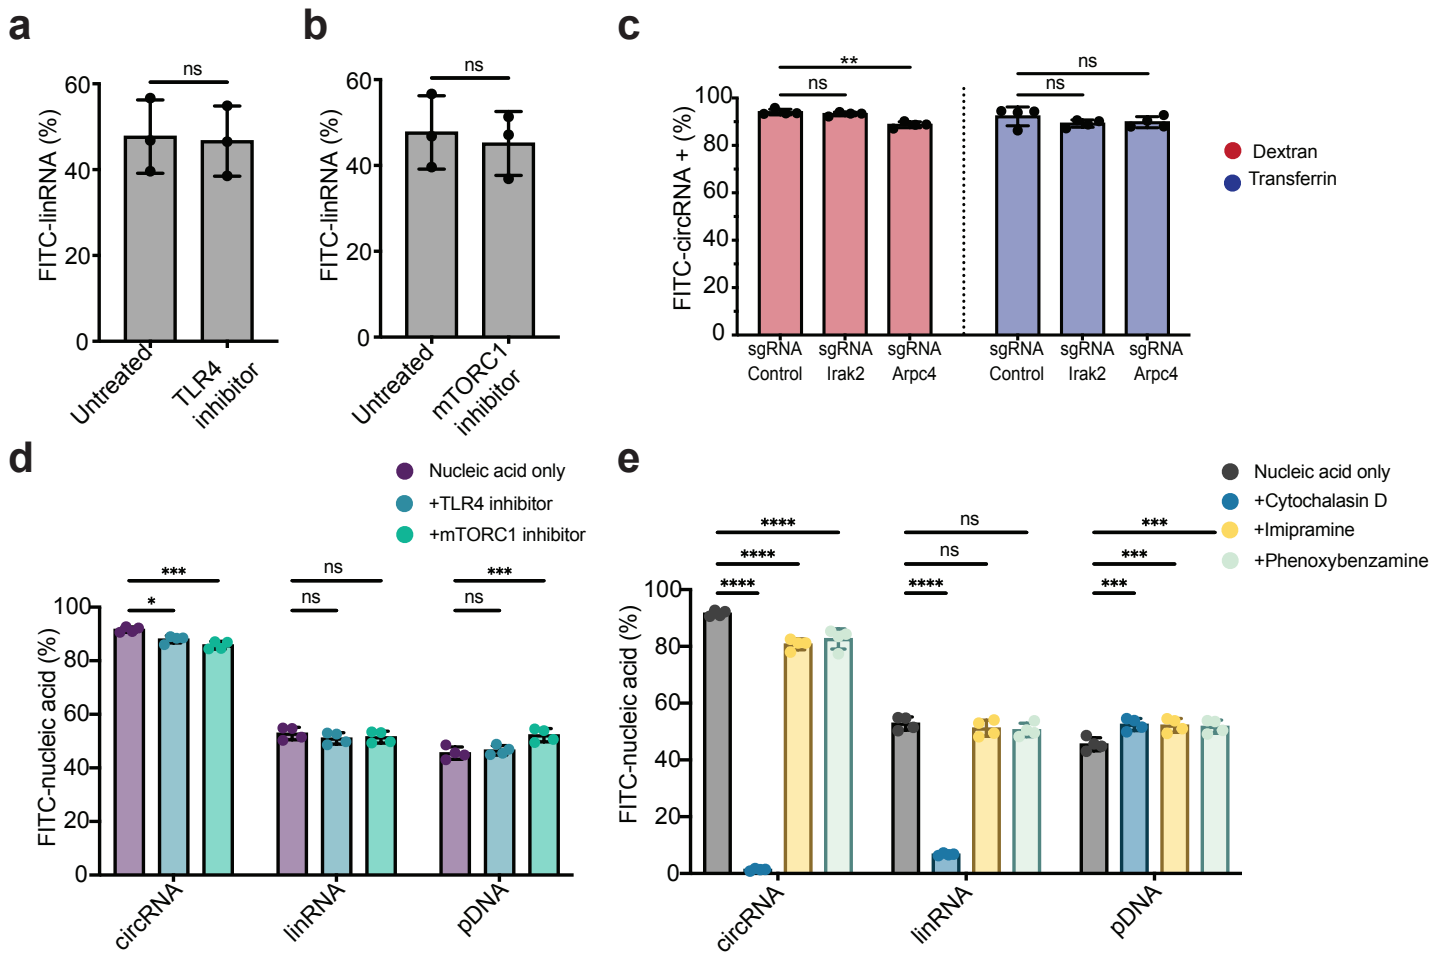

**Supplementary Figure 6. Validation of uptake regulators in distinct types of nucleic acids.** Related to Figure 5. **a**, Chemical inhibition of TLR4 and its effect in linRNA uptake in J774 cells ( $n = 3$ , bars represent SD). **b**, Chemical inhibition of mTORC1 and its effect in linRNA uptake in J774 ( $n = 3$ , bars represent SD). Statistical significance in **a** and **b** was calculated using Mann-Whitney test. **c**, Cellular uptake of dextran and transferrin after single gene KO in J774-Cas9 ( $n = 3$ , bars represent SD). **d**, Chemical inhibition of TLR4 and mTORC1 and its effect on circular RNA (circRNA), linear RNA (linRNA), and plasmid DNA (pDNA) uptake in J774 cells ( $n = 3$ , bars represent SD). **e**, Chemical inhibition of macropinocytosis and its effect on the uptake of circular RNA (circRNA), linear RNA (linRNA), and plasmid DNA (pDNA) in J774 cells ( $n = 3$ , bars represent SD). Statistical significance in **c-e** was calculated using two-way ANOVA and Dunnett's multiple comparisons test. \* $P < 0.05$ , \*\* $P < 0.01$ , \*\*\* $P < 0.001$ , \*\*\*\* $P < 0.0001$ . ns = not significant.



## Supplementary Tables

**Table S1. List of RNAs used throughout experiments. Related to STAR Methods.**

| Figure            | RNA         | CDS                | Size (kb) | RNA modification      | IRES                           | 5'UTR          | 3'UTR | Labeling |
|-------------------|-------------|--------------------|-----------|-----------------------|--------------------------------|----------------|-------|----------|
| Figure 1, 5       | cirRNA      | GFP (out of frame) | 1.9       | none                  | iCVB3                          | none           | none  | Cy3      |
| Figure 1          | linRNA      | GFP (out of frame) | 1.9       | none                  | iCVB3                          | none           | none  | Cy3      |
| Figure 1, 2       | cirRNA      | GFP (out of frame) | 1.9       | none                  | iCVB3                          | none           | none  | Cy5      |
| Figure 2, 3       | cirRNA      | GFP (out of frame) | 1.9       | none                  | iCVB3                          | none           | none  | none     |
| Figure 2          | linRNA      | GFP (out of frame) | 1.9       | none                  | iCVB3                          | none           | none  | none     |
| Figure 3, S4      | circOV<br>A | Ovalbumin          | 2.4       | 5% 2'-O-MethylIC      | synIRES-RC25<br>(iHRVB3-based) | 5' PABP spacer | HBA1  | none     |
| Figure 4          | cirRNA      | GFP (out of frame) | 1.9       | none                  | iCVB3                          | none           | none  | IONP     |
| Figure 4          | linRNA      | GFP (out of frame) | 1.9       | none                  | iCVB3                          | none           | none  | FITC     |
| Figure 4, 5       | cirRNA      | GFP (out of frame) | 1.9       | none                  | iCVB3                          | none           | none  | FITC     |
| Figure S1, S3, S5 | cirRNA      | GFP (out of frame) | 1.9       | none                  | iCVB3                          | none           | none  | none     |
| Figure S1, S3, S5 | linRNA      | GFP (out of frame) | 1.9       | none                  | iCVB3                          | none           | none  | none     |
| Figure S1         | mRNA        | GFP (out of frame) | 1.9       | CleanCap and 100% N1Ψ | iCVB3                          | none           | none  | none     |
| Figure S2         | cirRNA      | GFP (out of frame) | 1.9       | none                  | iCVB3                          | none           | none  | Cy3      |
| Figure S2         | linRNA      | GFP (out of frame) | 1.9       | none                  | iCVB3                          | none           | none  | Cy3      |
| Figure S2         | mRNA        | GFP (out of frame) | 1.9       | CleanCap and 100% N1Ψ | iCVB3                          | none           | none  | Cy3      |
| Figure S2, S3     | cirRNA      | GFP (out of frame) | 1.9       | none                  | iCVB3                          | none           | none  | Cy5      |
| Figure S4         | cirRNA      | GFP (out of frame) | 1.9       | none                  | iCVB3                          | none           | none  | Cy5      |
| Figure S1, S4     | cirRNA      | GFP (out of frame) | 1.9       | none                  | iCVB3                          | none           | none  | AF488    |
| Figure S4         | linRNA      | GFP (out of frame) | 1.9       | none                  | iCVB3                          | none           | none  | AF488    |
| Figure S4         | cirRNA      | GFP (out of frame) | 1.9       | none                  | iCVB3                          | none           | none  | pHrodo   |
| Figure S4         | circRN<br>A | NanoLuciferase     | 1.7       | 5% 2'-O-MethylIC      | synIRES-RC25<br>(iHRVB3-based) | 5' PABP spacer | HBA1  | none     |
| Figure S4         | mRNA        | NanoLuciferase     | 1.7       | CleanCap and 100% N1Ψ | none                           | 5' PABP spacer | HBA1  | none     |
| Figure S6         | cirRNA      | GFP (out of frame) | 1.9       | none                  | iCVB3                          | none           | none  | FITC     |
| Figure S6         | cirRNA      | GFP (out of frame) | 1.9       | none                  | iCVB3                          | none           | none  | FITC     |
